# Supplementary material for: Distinct functions of FASCICLIN-LIKE ARABINOGALACTAN PROTEINS relate to domain structure
Source: PubMed Central journal article supplement (PMC10152678; doi:10.1093/plphys/kiad097), 2023-02-17
Supplement: kiad097_supplementary_data.pdf [file kiad097_supplementary_data.pdf]

Supplemental Data for

**Distinct functions of FASCILIN-LIKE ARABINOGALACTAN  
PROTEINS relate to domain structure**

Yingxuan Ma<sup>1,2</sup>, Thomas Shafee<sup>2</sup>, Asha M Mudiyansele<sup>2</sup>, Julian Ratcliffe<sup>2</sup>, Colleen P MacMillan<sup>3</sup>, Shawn D Mansfield<sup>4</sup>, Antony Bacic<sup>2,5</sup>, Kim L Johnson<sup>2,5\*</sup>

\* Corresponding author: Kim L Johnson

**Email:** [k.johnson@latrobe.edu.au](mailto:k.johnson@latrobe.edu.au)

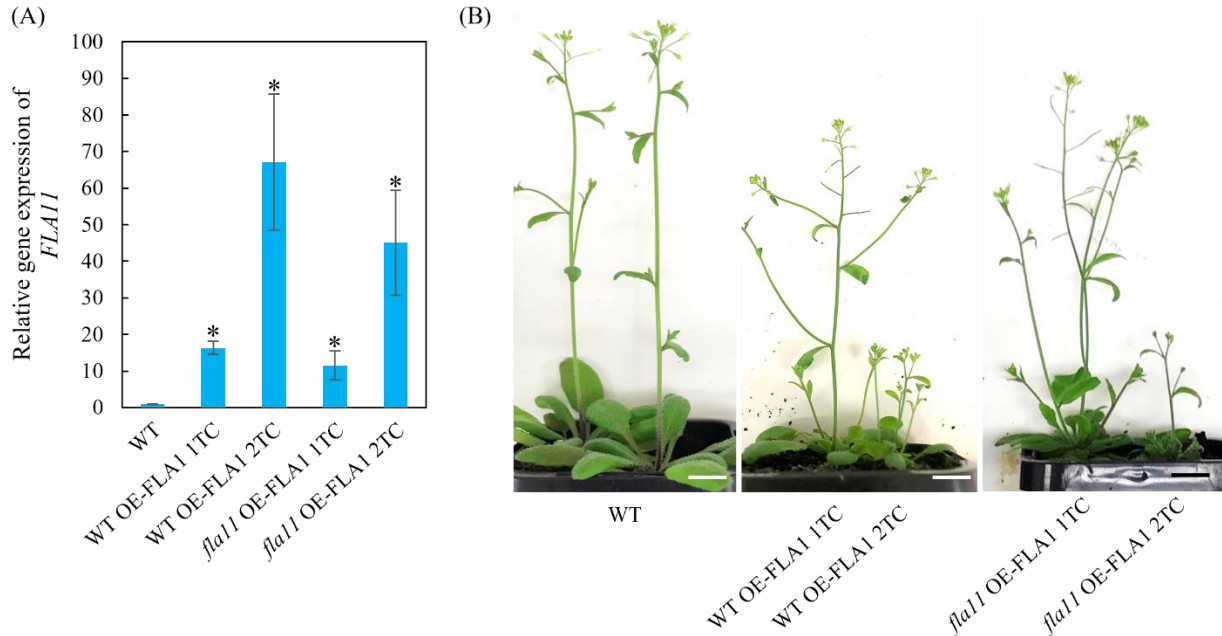

**Supplemental Figure S1. RT-qPCR and phenotypic analyses of WT OE-FLA11 and *fla11* OE-FLA11 transgenic plants compared with wild-type (WT) plants.** (A) RT-qPCR analysis of stage 6.0 (Boyes et al., 2001) plant stems showed *FLA11* transcript levels relative to *ACT2* up-regulated in both WT OE-FLA11 and *fla11* OE-FLA11 transgenic plants compared to wild type (WT). Data shown are average values  $\pm$  SD ( $n \geq 3$  plants from three independent transformed lines). Asterisks indicate a significant difference compared to WT plants according to Student's *t*-test (\*,  $P < 0.05$ ). (B) Phenotypic analysis of stage 6.1 (Boyes et al., 2001) WT OE-FLA11 and *fla11* OE-FLA11 transgenic plants with one (1TC) or two transgene copies (2TC) and compared to WT. 2TC plants with higher *FLA11* expression levels displayed shorter plant stem length than one transgene copy (1TC) lines. *FLA11* expression levels and plant stem phenotypes were comparable in OE-FLA11 plants with either WT or *fla11* background. Scale: 1 cm.

(A) MATSRTFIFSNLFIFFLVIATTYGPGHHHHHHGGGGSMVSKGEELFTGVVPILVELDGDVNGHKFSVSGE  
GEGDATYGKLTLLKLICTTGKLPVPWPTLVTTGLGYGLQCFARYPDHMKQHDFFKSAMPEGYVQERTIFFK  
DDGNYKTRAEVKFEGDTLVNRIELKGDIFKEDGNILGHKLEYNYNSHNVYLTADKQKNGIKANFKIRHN  
IEDGGVQLADHYQONTPIGDGPVLLPDNHYSYQSALSKDPNEKRDHMLLEFVTAAGITLGMDELYK  
GGGGSGGGSPRQAPAPGPSGPTNITAILEKAGQFTLFIRLLKSTQASDQINTQLNSSSSNGLTVFAPTDNA  
FNSLKSGTLNSLSDQQKVLVQFHVLPTLITMPQFQTVSNPLRTQAGDGQNGKFPLNITSSGNQVNITTG  
VVSATVANSVYSKQLAVYQVDQVLLPLAMFGSSVAPAPPEKGGSVSKGSASGGDDGGDSTDSSDAE  
RTGFGGIRITTVAAIAASSLWI

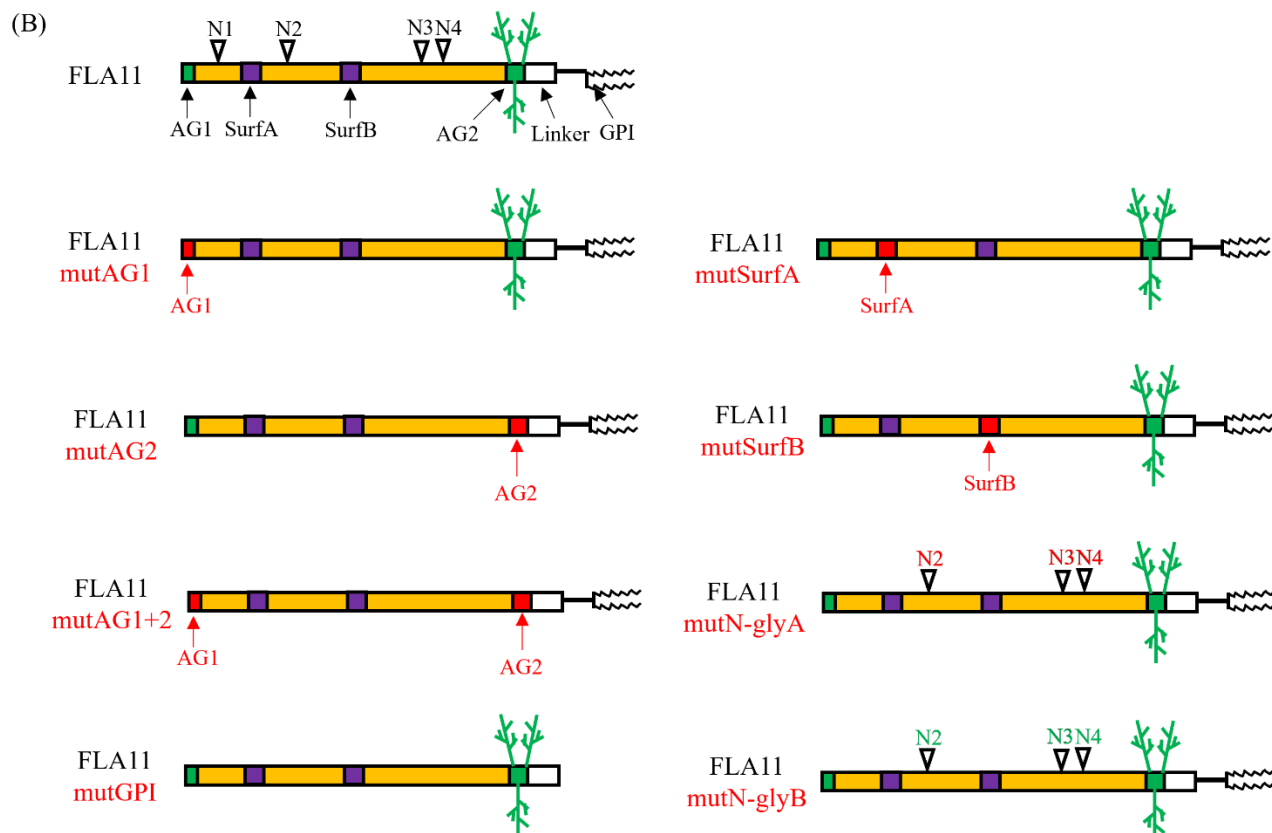

**Supplemental Figure S2. YFP- FLA11 fusion protein amino acid sequence and schematic representation of FLA11 mutant variants.** (A) The YFP sequence (yellow highlighted) was inserted after the FLA11 signal peptide (SP, underlined) and 6\*His tag and G linker (blue), another G linker (blue) was inserted between YFP and FLA11 no SP sequence. Other predicted domains are indicated: arabinogalactan motif 1 and 2 (green), N-glycosylation motif (blue highlighted), Surf A and B (purple with grey highlighted), linker (orange), glycosylphosphatidylinositol (GPI)-anchor (black). (B) Schematic representation of FLA11 mutant variants.

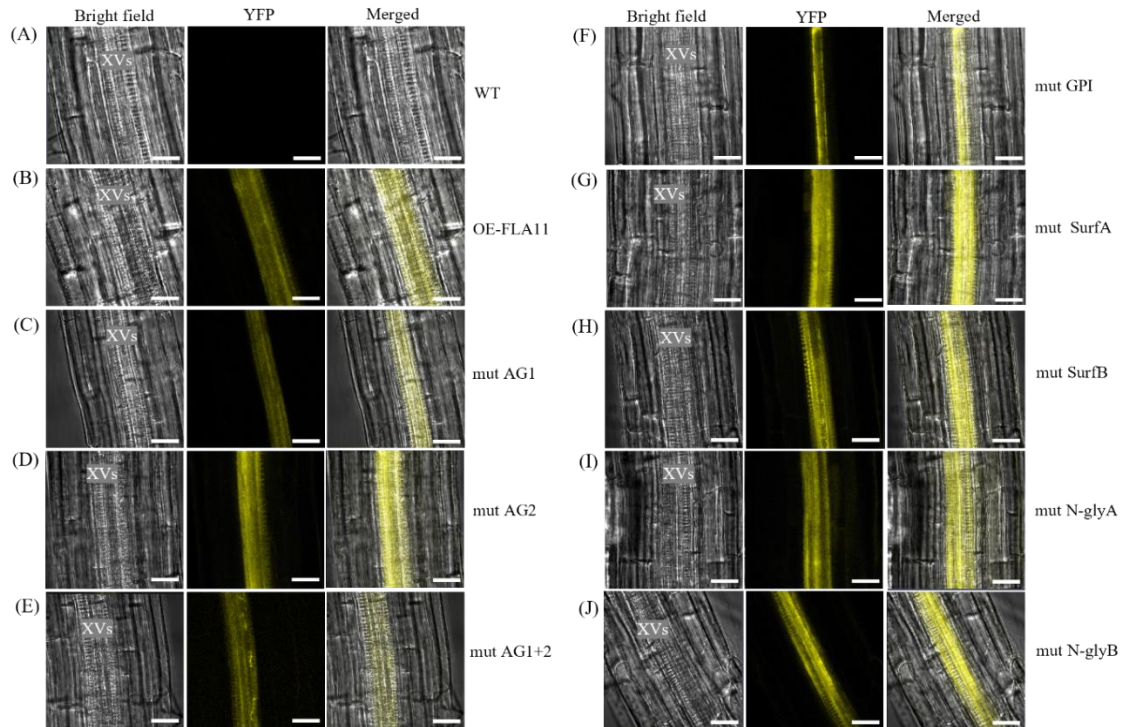

**Supplemental Figure S3. Visualization of YFP in wild-type (WT) Arabidopsis plants stably transformed with OE-FLA11 and its mutant variants.** YFP fluorescence signals in 10-day old seedling roots of WT (A), OE-FLA11 (B) and lines with mutations in AG1 (C), AG2 (D), AG1+2 (E), GPI (F), SurfA (G), SurfB (H), N-glyA (I), and N-glyB (J) in xylem vessels (XVs). Scale bar = 20  $\mu$ m. At least three independent transformed lines of each mutant variant were used for further analysis.

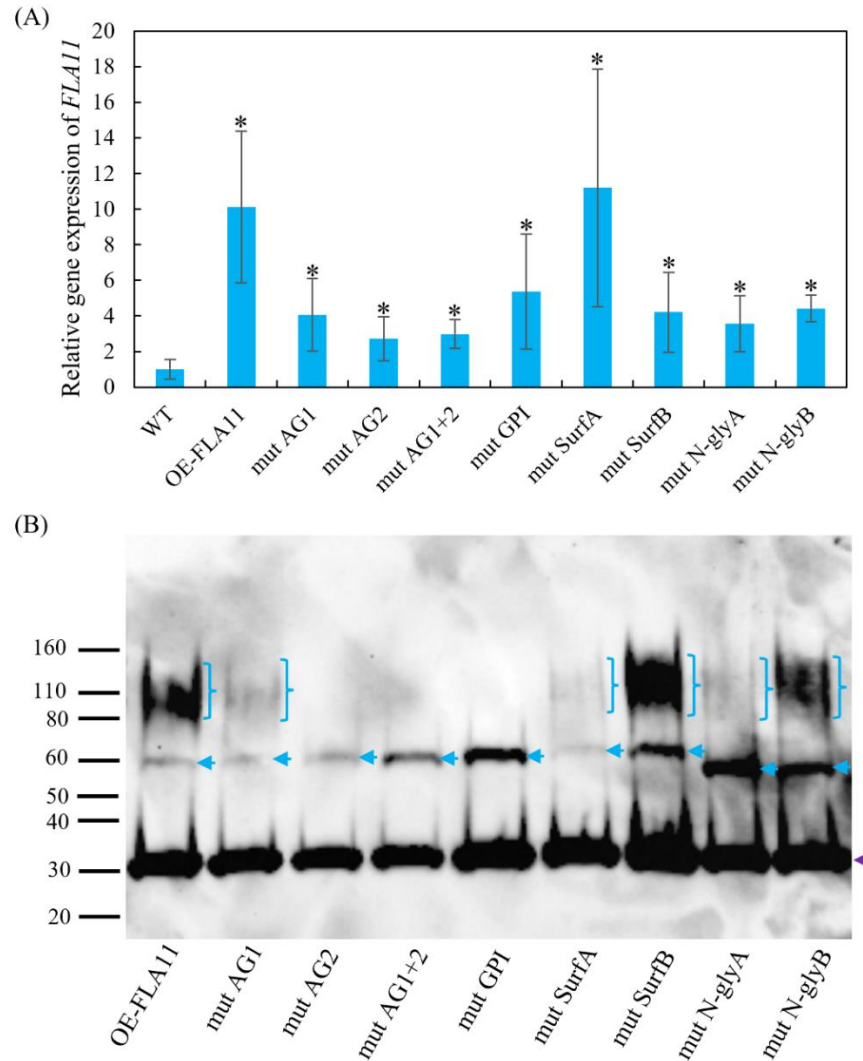

**Supplemental Figure S4. RT-qPCR and protein blotting analysis of OE-FLA11 and mutant variant plants. (A)** RT-qPCR results showing *FLA11* transcript levels relative to *ACT2* in wild-type (WT), OE-FLA11 and FLA11 domain mutation plants. Data shown are average values  $\pm$  SD ( $n \geq 3$  plants from three independent transformed lines). Asterisks indicate a significant difference compared to WT plants according to Student's *t*-test (\*,  $P < 0.05$ ). **(B)** Denatured GFP-trap enriched proteins extracted from OE-FLA11 and OE-FLA11 mutant variants 10-day-old seedlings were used for SDS-PAGE and protein blot analysis and detected with anti-YFP antibody. Blue arrows indicate YFP-FLA11/FLA11 mutant variant proteins that are unglycosylated with MW around 60 kDa. Purple arrows indicated YFP cleaved from fusion proteins. Smear bands of higher MW, indicated by blue brackets, likely represent proteins with AG glycosylation.



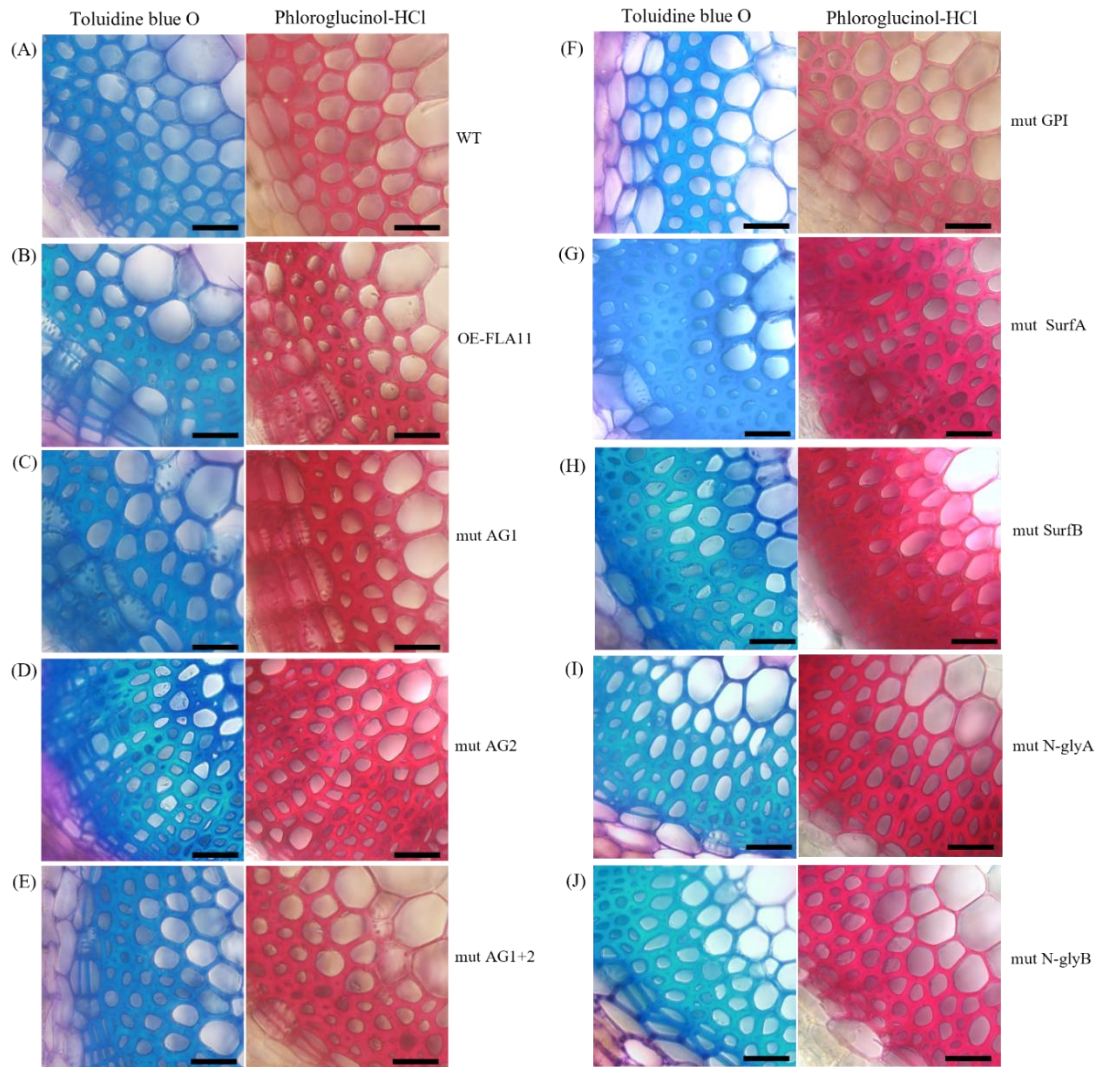

**Supplemental Figure S5. Histological analyses of interfascicular fibers (IFs) at the base of stems of WT, OE-FLA11, and OE-FLA11 mutant variant plants with one transgene copy (1TC).** Sections taken from fresh stems of stage 6.9 plants (Boyes et al., 2001) at 1 cm from the base were stained with either Toluidine blue O or phloroglucinol-HCl to show cellular morphology and lignin composition. Compared to WT stem IFs (A), OE-FLA11 (B) appear to have thicker IF walls. IF walls in OE-FLA11 lines with mutations in AG1 (C), AG2 (D), AG1+2 (E), SurfA (G), SurfB (H), and N-glyB (J) show similar wall thickness and lignin staining to OE-FLA11 whereas lines with mutations in GPI (F) and N-glyA (I) are more similar to WT. Scale bar = 20  $\mu\text{m}$ .

(A)

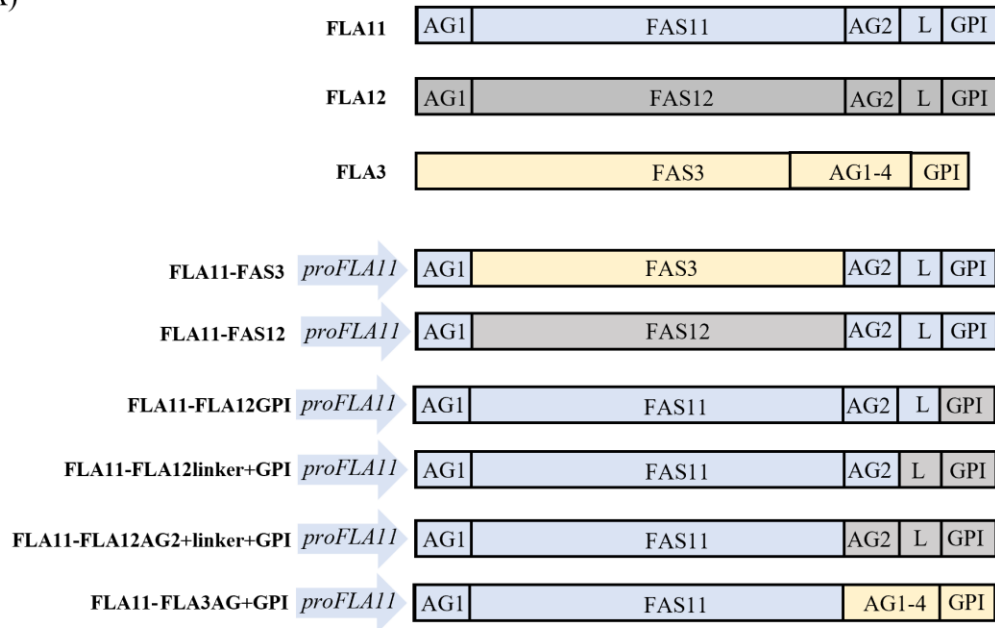

(B)

**FLA12 without signal peptide:**

QPSPAVAPAPPPTNVTKILEKAGQFTVFIRLLKSTGVANQLYGQLNNSDNGITIFAPSDSSFTGLKAG  
TLNSLTDEQQVELIQFHVIPSIVSSSNFQTISNPLRTQAGDSADGHFPLNVTTSNGNTVNTISGVTNTTV  
SGNVYSDGQLAVYQVDKVLPPQVFDPRPPAPAPAPSVSKSKKKKDDSDSSDDSPA**DASFALRNV**  
**GSVCDAVSFCVMSVMLAWFYL**

**FLA3 without signal peptide:**

VNITRVLEKYPEFSTMTPELLAKTELTPIINKRQTITVLALNNDIAIGSISGRPEEEVKNILMNHVVDYF  
DELKALKALKEKSTLLTLYQSTGLGQQQNGFLNCTKSNGKIYFGSGVKGAPQTAEYITVFRNPY**NL**  
**S**VVQISMPIVAPGLGSPVKVPPPPMSSPPAPSPKKGAA**TPAPAPA**DEGDYAD**APPGLAPETAPASAP**  
SESD**SPAPAP**DKSGKKMAAADEAEPP**SSASNTGLSFGAVLVLGFVASFVGF**

**Supplemental Figure S6. Schematic representation of FLA domain swaps and YFP-FLA12**

**and FLA3 protein sequences.** (A) Schematic representation of FLA11, FLA12 and FLA3 domain swaps. FLA11, FLA12 and FLA3 proteins shaded with blue, grey, and yellow, respectively. AG1: AG glycomotif at N-terminal. AG2: AG glycomotif closest to GPI-anchor region (GPI) at C-terminal. AG1-4: AG glycomotif 1 to 4 of FLA3, indicated in green text in (B). FAS11: FAS1 region of FLA11. FAS12: FAS1 region of FLA12. FAS3: FAS1 region of FLA3. (B) FLA12 and FLA3 protein amino acid sequences with highlighting to indicate domains/motifs. Arabinogalactan glycomotif (green), N-glycosylation motif within FAS1 domain (dark grey), and glycosylphosphatidylinositol (light blue highlighting) are indicated in the text.

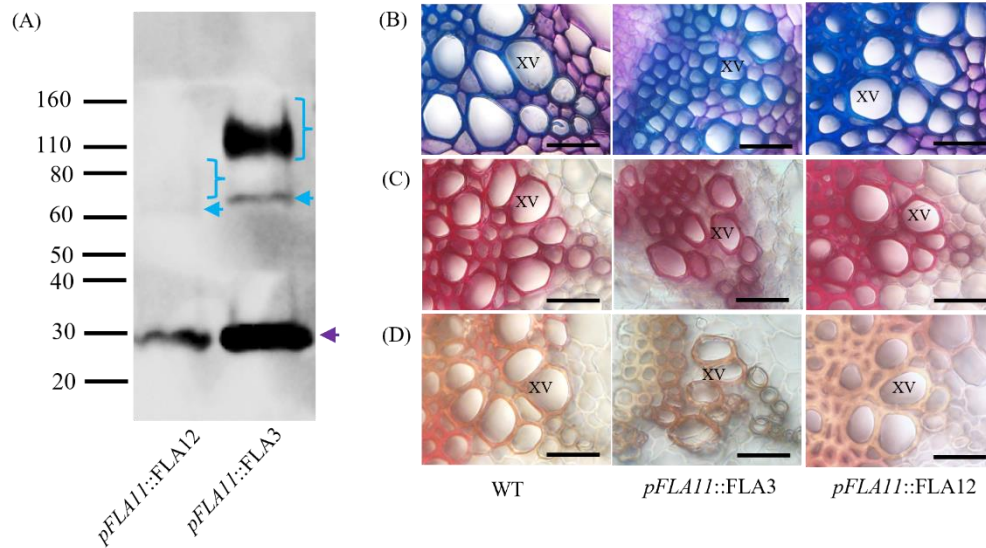

**Supplemental Figure S7. Comparison of FLA12 and FLA3 domain swap fusion proteins and histological analyses of xylem vessels (XVs) at the base of stems of wild-type (WT), *pFLA11::FLA3*, and *pFLA11::FLA12*.** (A) Protein blotting of GFP-trap enriched *pFLA11::FLA12* and *pFLA11::FLA3* from 10-day-old seedlings labelled with anti-YFP antibody. Blue arrows indicate YFP-FLA12/FLA3 and domain swap/mutation variant proteins that are un-glycosylated with MW around 60 kDa. Purple arrows indicate YFP cleaved from fusion proteins. Smear bands of higher MW, indicated by blue brackets, likely represent proteins with AG glycosylation. (B-D) Sections taken from fresh stems of stage 6.9 plants (Boyes *et al.*, 2001) at 1 cm from the base were stained with either Toluidine blue (B), phloroglucinol-HCl (C) or Mäule (D) to show cellular morphology and lignin composition. *pFLA11::FLA3* plant stems show smaller XV diameters compared to WT. *pFLA11::FLA12* plant stems show similar XV diameter and lignin composition compared to WT. Scale bar = 20  $\mu$ m.



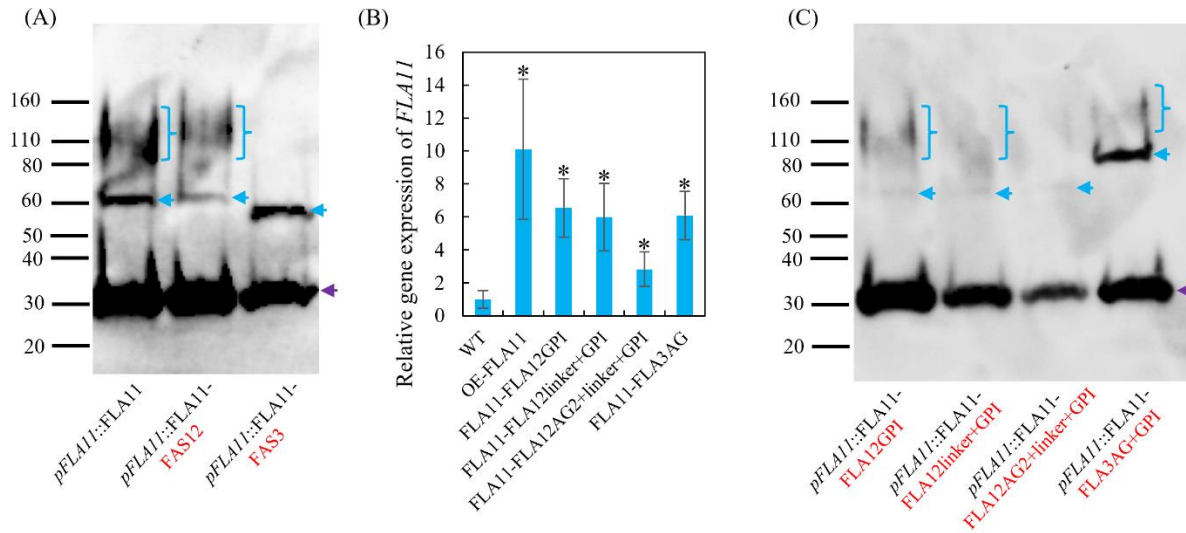

**Supplemental Figure S8. Comparison of FLA11, FLA12, and FLA3 domain swap fusion proteins.** (A) Protein blotting of GFP-trap enriched OE-FLA11, *pFLA11::FLA11-FAS12*, and *pFLA11::FLA11-FAS3* from 10-day-old seedlings labelled with anti-YFP antibody. Blue arrows indicate YFP-FLA11 and domain swap/mutation variant proteins that are un-glycosylated with MW around 60 kDa. Purple arrows indicate YFP cleaved from fusion proteins. Smearing bands of higher MW, indicated by blue brackets, likely represent proteins with AG glycosylation. (B) *FLA11* transcript levels relative to *ACT2* in domain swap plants. Data shown are average values  $\pm$  SD ( $n \geq 3$  plants from three independent transformed lines). Asterisks indicate a significant difference compared to WT plants according to Student's *t*-test (\*,  $P < 0.05$ ). (C) Protein blotting of GFP-trap enriched *pFLA11::FLA11-FLA12GPI*, *pFLA11::FLA11-FLA12linker+GPI*, *pFLA11::FLA11-FLA12AG2+linker+GPI*, and *pFLA11::FLA11-FLA3AG+GPI* from 10-day-old seedlings labelled with anti-YFP antibody.

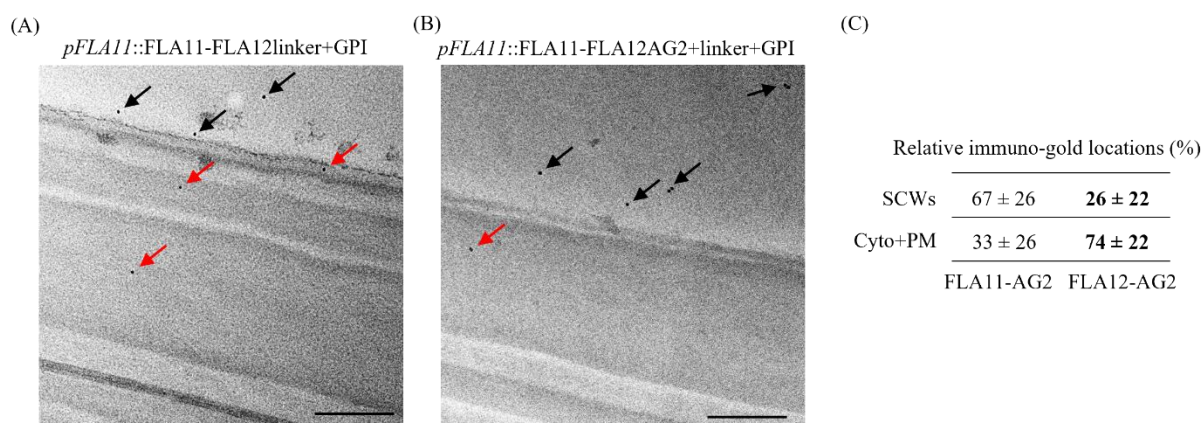

**Supplemental Figure S9. Sub-cellular location of HIS-YFP-FLA11-FLA12linker-FLA12GPI and HIS-YFP-FLA11-FLA12AG2-FLA12linker-FLA12GPI in interfascicular fiber (IF) cells at the base region of stems.** Transmission-electron microscopy (TEM) immuno-labelling detection of HIS-tagged FLA11 in ultrathin, transverse sections at 1 cm from the stem base of stage 6.9 plants with one transgene copy (1TC). Red arrows indicate gold particles in SCWs, black arrows indicate gold particles in plasma membrane (PM)/cytoplasm (cyto). In IF cells of *pFLA11::FLA11-FLA12linker+GPI* plants (A) immuno-gold labelling is largely found in the SCWs with some label present at the PM/cyto. In IF cells of *pFLA11::FLA11-FLA12AG2+linker+GPI* plants (B) immuno-gold labelling is largely found in the cyto+PM with some label present at the SCWs. (C) Quantification of immuno-gold signals in SCWs and PM/cyto. Data shown as average ± SD. N = two biological replicates and two technical replicates from two independent transformed lines. Scale bar = 500 nm.

**Supplemental Table S1.** List of vectors used for FLA11 domain mutation and deletion.

| Vector ID | Description                                                         | Purpose                                        |
|-----------|---------------------------------------------------------------------|------------------------------------------------|
| YMV111    | pGreen0179- <i>proFLA11</i> ::spFLA11-His-YFP-FLA11                 | Stable transformation in<br><i>Arabidopsis</i> |
| YMV112    | pGreen0179- <i>proFLA11</i> ::spFLA11-His-YFP-FLA11 AG1 mutation    |                                                |
| YMV113    | pGreen0179- <i>proFLA11</i> ::spFLA11-His-YFP-FLA11 AG2 mutation    |                                                |
| YMV114    | pGreen0179- <i>proFLA11</i> ::spFLA11-His-YFP-FLA11 AG1+2 mutation  |                                                |
| YMV115    | pGreen0179- <i>proFLA11</i> ::spFLA11-His-YFP-FLA11 GPI deletion    |                                                |
| YMV116    | pGreen0179- <i>proFLA11</i> ::spFLA11-His-YFP-FLA11 SurfA mutation  |                                                |
| YMV117    | pGreen0179- <i>proFLA11</i> ::spFLA11-His-YFP-FLA11 SurfB mutation  |                                                |
| YMV118    | pGreen0179- <i>proFLA11</i> ::spFLA11-His-YFP-FLA11 N-glyA mutation |                                                |
| YMV119    | pGreen0179- <i>proFLA11</i> ::spFLA11-His-YFP-FLA11 N-glyB mutation |                                                |

**Supplemental Table S2.** List of primers used for FLA11 domain mutation/deletion vector constructions.

| Name                       | Primer sequence                                                                                                 | Purpose                                                             |
|----------------------------|-----------------------------------------------------------------------------------------------------------------|---------------------------------------------------------------------|
| YMV111- <i>proFLA11</i> -F | ACTATAGGGCGAATTGGGTACCcagcagcgtagatcttttgagtg                                                                   | Cloning <i>FLA11</i> promoter with overlaps for vector construction |
| YMV111- <i>proFLA11</i> -R | GAATGTTCTTGAAGTAGCCATGGtgtttagtgtgtgtgtatgttg                                                                   |                                                                     |
| pGreenKpnI35S-F            | C G A C T C A C T A T A G G G C G A A T T G                                                                     | <i>FLA11</i> AG1 mutation vector construction                       |
| FLA11-AG Mut1_1R           | agcgctgcagctgcagcCTGcctaggTGACCCACCTC                                                                           |                                                                     |
| FLA11-AG Mut1_2F           | GCTGCAGCTGCAGGCGCTTCAGGTCCAACGAACATAACC                                                                         |                                                                     |
| pGreenNotIOCS-R            | CTGGAGCTCCACCGCG                                                                                                | <i>FLA11</i> AG2 mutation vector construction                       |
| pGreenKpnI35S-F            | C G A C T C A C T A T A G G G C G A A T T G                                                                     |                                                                     |
| FLA11-AG Mut2_1R           | agcgctgcagctgcagcCTGcctaggTGACCCACCTC                                                                           |                                                                     |
| FLA11-AG Mut2_2F           | GCTGCAGCTGCAGGCGCTTCAGGTCCAACGAACATAACC                                                                         | <i>FLA11</i> AG1+AG2 mutation vector construction                   |
| pGreenNotIOCS-R            | CTGGAGCTCCACCGCG                                                                                                |                                                                     |
| pGreenKpnI35S-F            | C G A C T C A C T A T A G G G C G A A T T G                                                                     |                                                                     |
| FLA11-AG Mut1_1R           | agcgctgcagctgcagcCTGcctaggTGACCCACCTC                                                                           | <i>FLA11</i> AG1+AG2 mutation vector construction                   |
| FLA11-AG Mut1_2F           | GCTGCAGCTGCAGGCGCTTCAGGTCCAACGAACATAACC                                                                         |                                                                     |
| FLA11-AG Mut2_1R           | agcgctgcagctgcagcCTGcctaggTGACCCACCTC                                                                           |                                                                     |
| FLA11-AG Mut2_2F           | GCTGCAGCTGCAGGCGCTTCAGGTCCAACGAACATAACC                                                                         | <i>FLA11</i> GPI deletion vector construction                       |
| pGreenNotIOCS-R            | CTGGAGCTCCACCGCG                                                                                                |                                                                     |
| pGreenKpnI35S-F            | C G A C T C A C T A T A G G G C G A A T T G                                                                     |                                                                     |
| YM105FLA11noGPI_R          | C A T A T C T C A T T A A A G C A G G A C T C T A G A T T A T G A A T C A G T A G A A T C T C C T C C A T C A T | <i>FLA11</i> Surface A mutation vector construction                 |
| pGreenKpnI35S-F            | C G A C T C A C T A T A G G G C G A A T T G                                                                     |                                                                     |
| F11-SurA-Mut_1R            | A G C T G C A A C G G C T T G A A A C T G A G G C A T G G T T A T G A                                           |                                                                     |
| F11-SurA-Mut_2F            | G C C G T T G C A G C T C T T T A C G C A C G C A A G C T G                                                     | <i>FLA11</i> Surface B mutation vector construction                 |
| pGreenNotIOCS-R            | CTGGAGCTCCACCGCG                                                                                                |                                                                     |
| pGreenKpnI35S-F            | C G A C T C A C T A T A G G G C G A A T T G                                                                     |                                                                     |
| F11-SurB-Mut_1R            | tgcTATGAACAATGTGAATTGACCAGC                                                                                     | <i>FLA11</i> Surface B mutation vector construction                 |
| F11-SurB-Mut_2Fnew         | CAATTCACATTGTTTCATAgcaCTTCTTAAAAGCACTCAAGCCTCA                                                                  |                                                                     |
| F11-SurB-Mut_2R            | cgtaaggttcggaagcagggcttgcGAAGGCGTTATCAGTCGGG                                                                    |                                                                     |
| F11-SurB-Mut_3F            | gcaagcctcgttcggaaccttagcgTCATTGTCTGACCAACAAAAGTTC                                                               | <i>FLA11</i> N-glycosylation A mutation vector construction         |
| pGreenNotIOCS-R            | CTGGAGCTCCACCGCG                                                                                                |                                                                     |
| pGreenKpnI35S-F            | C G A C T C A C T A T A G G G C G A A T T G                                                                     |                                                                     |
| F11-NglyA-Mu_1R            | tgcagaagcGAGCTGAGTGTTGATTTGGTCTG                                                                                | <i>FLA11</i> N-glycosylation A mutation vector construction         |
| F11-NglyA-Mu_2Fnew         | ATCAAACTCAGCTCgctctgcaTCGAGTAATGGCTTAACCGTGT                                                                    |                                                                     |
| F11-NglyA-Mu_2R            | tgcgatgcAACTTGTTACCGGAGCTagcgatggcAAGAGGGAATTTACCGTTTGG                                                         |                                                                     |
| F11-NglyA-Mu_3F            | gccatcgctAGCTCCGGTAACCAAGTTgcatcgcaACTGGAGTTGTCAGCGCCAC                                                         | <i>FLA11</i> N-glycosylation B mutation vector construction         |
| pGreenNotIOCS-R            | CTGGAGCTCCACCGCG                                                                                                |                                                                     |
| pGreenKpnI35S-F            | C G A C T C A C T A T A G G G C G A A T T G                                                                     |                                                                     |
| F11-NglcB-Mu_1R            | ttgGAGCTGAGTGTTGATTTGGTCTG                                                                                      | <i>FLA11</i> N-glycosylation B mutation vector construction         |
| F11-NglcB-Mu_2Fnew         | ACCAAATCAAACTCAGCTCcaaTCTTCCTCGAGTAATGGCTTAAC                                                                   |                                                                     |
| F11-NglcB-Mu_2R            | ttgAACTTGTTACCGGAGCTAGTGATctgAAGAGGGAATTTACCGTTTGG                                                              |                                                                     |
| F11-NglcB-Mu_3F            | cagATCACTAGCTCCGGTAACCAAGTTcaaATCACCCTGGAGTTGT CAGC                                                             | <i>FLA11</i> N-glycosylation B mutation vector construction         |
| pGreenNotIOCS-R            | CTGGAGCTCCACCGCG                                                                                                |                                                                     |

**Supplemental Table S3.** List of vectors used for domain swaps.

| Vector ID | Description                                                                                 | Purpose                |
|-----------|---------------------------------------------------------------------------------------------|------------------------|
| ARV1      | pGreen0179- <i>proFLA11</i> ::spFLA11-His-YFP-FLA3                                          | Promoter swap study    |
| YMV261    | pGreen0179- <i>proFLA11</i> ::spFLA12-His-YFP-FLA12                                         |                        |
| YMV171    | pGreen0179- <i>proFLA11</i> :: spFLA11-His-YFP-FLA11AG1-FAS12-FLA11AG2-FLA11GPI             | FAS1 swap study        |
| ARV2      | pGreen0179- <i>proFLA11</i> ::spFLA11-His-YFP-FLA11AG1-FAS3-FLA11AG2-FLA11GPI               |                        |
| YMV162    | pGreen0179- <i>proFLA11</i> ::spFLA11-His-YFP-FLA11AG1-FAS11-FLA11AG2-FLA11 linker-FLA12GPI | AG2 and GPI swap study |
| YMV173    | pGreen0179- <i>proFLA11</i> ::spFLA11-His-YFP-FLA11AG1-FAS11-FLA11AG2-FLA12 linker-FLA12GPI |                        |
| YMV172    | pGreen0179- <i>proFLA11</i> ::spFLA11-His-YFP-FLA11AG1-FAS11-FLA12AG2-FLA12 linker-FLA12GPI |                        |
| ARV3      | pGreen0179- <i>proFLA11</i> ::spFLA11-His-YFP-FLA11AG1-FAS11-FLA3AG-FLA3GPI                 |                        |

**Supplemental Table S4.** List of primers used for domain swap vector constructs.

| Name                | Primer sequence                                                                               | Purpose |
|---------------------|-----------------------------------------------------------------------------------------------|---------|
| ARP9                | GCGGAGGTGGGTACCTAGGGTTAACATAACCCGAGTGCTCG                                                     | ARV1    |
| ARP2                | ATATCTCATTAAGCAGGACtctagaTTAGAACCCAACAAAGCTA<br>GCCA                                          |         |
| ARP10 Nos           | GTCCTGCTTTAATGAGATATGC                                                                        |         |
| pGreen-OCS-R        | CTGGAGCTCCACCGCG                                                                              |         |
| YMV171-FAS12-F      | CAGGCGGAGGTGGGTCAcctaggCAGGCTCCAGCTCCAGGCCCTT<br>CAGGTCCCACAAACGTTACCAAATCCTAGAG              | YMV171  |
| YMV171-FAS12-R      | CAAAACCTTATCGACCTGATAAACAGCG                                                                  |         |
| YMV171-F11AG-F      | ATCAGGTCGATAAAGTTTTGCTGCCATTAGCCATGTTTGGATC<br>AAG                                            |         |
| pGreen-OCS-R        | CTGGAGCTCCACCGCG                                                                              |         |
| ARP3                | CGGTTTCAGGCGGAGGTGGGTCAcctaggCAGGCTCCAGCTCCAG<br>GCCCTTCAGGTGTTAACATAACCCGAGTGCTCG            | ARV2    |
| ARP4                | TTTACACACCAGAACCAAAGTAAATC                                                                    |         |
| ARP5                | GATTTACTTTGGTTCTGGTGTGAAACTGCCATTAGCCATGTTTG<br>G                                             |         |
| pGreen-OCS-R        | CTGGAGCTCCACCGCG                                                                              |         |
| YMV111proF11-F      | ACTATAGGGCGAATTGGGTACCcagcagcctagatcttttgagtg                                                 | YMV162  |
| 162F11-R            | ACGCAAAACGACACCGCATCACACACAGAACCAACATTACGC<br>AAAGCAAACGAAGCATCTGAATCAGTAGAATCTCCTCCATCA<br>T |         |
| 162F12GPI-F         | GATGCGGTGTCGTTTTGCGTCATGAGTGTAATGCTCGCATGGT<br>TTTATTTGTGATCTAGAGTCCTGCTTTAATGAGAT            |         |
| pGreen-OCS-R        | CTGGAGCTCCACCGCG                                                                              |         |
| YMV101-F11-F        | CAGGCGGAGGTGGGTCAcctaggCAGGCTCCAGCTCCAGGC                                                     | YMV173  |
| YMV173-FAS11AG2_R   | AGGGGCCGGAGCAGG                                                                               |         |
| YMV173-F12linkGPI-F | GTGGCTCCTGCTCCGCCCCCTGTATCGAAATCAAAGAAGAAG<br>AAGGATGACAGT                                    |         |
| pGreen-OCS-R        | CTGGAGCTCCACCGCG                                                                              |         |
| YMV101-F11_F        | CAGGCGGAGGTGGGTCAcctaggCAGGCTCCAGCTCCAGGC                                                     | YMV172  |
| YMV273-FAS11-R      | CAAACTTGATCAACCTGATAAACGGCC                                                                   |         |
| YMV273-F12AG-F      | ATCAGGTTGATCAAGTTTTGCTTCCACAACAAGTTTTTCGATCC<br>TCG                                           |         |
| pGreen-OCS-R        | CTGGAGCTCCACCGCG                                                                              |         |
| ARP7                | TCAGCGTTTTGAGGAGCGCCAAAACCTTGATCAACCTGATAA<br>ACG                                             | ARV3    |
| ARP8                | GGCGCTCCTCAAACCGC                                                                             |         |
| ARP9                | GCGGAGGTGGGTACCTAGGGTTAACATAACCCGAGTGCTCG                                                     |         |
| pGreen-OCS-R        | CTGGAGCTCCACCGCG                                                                              |         |



**Supplemental Table S5.** List of primers used for RT-qPCR.

| Target gene                 | Forward primer       | T <sub>m</sub><br>(°C) | Reverse Primer        | T <sub>m</sub><br>(°C) |
|-----------------------------|----------------------|------------------------|-----------------------|------------------------|
| <i>FLA11</i><br>(AT5G03170) | AAGCACTCAAGCCTCAGACC | 67                     | TGAAGGCGTTATCAGTCGGG  | 67                     |
| <i>ACT2</i><br>(AT3G18780)  | ACATTGTGCTCAGTGGTGGA | 67                     | GAGATCCACATCTGCTGGAAT | 64                     |
